# Supplementary material
Source: Springer Nature journal article supplement (https://www.springermedizin.de/resource/supplementary/12889_2010_2187_MOESM1_ESM.pdf/9484900)
Supplement: MOESM1 [file 9484900]

Step 1: Analysis of health and quality of life

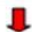

Step 2: Analysis of risk factors

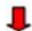

Step 3: Analysis of determinants of exposure to the risk factors

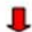

Step 4: Intervention mapping

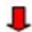

Step 5: Intervention implementation
